# Supplementary material
Source: PubMed Central journal article supplement (PMC3901019)

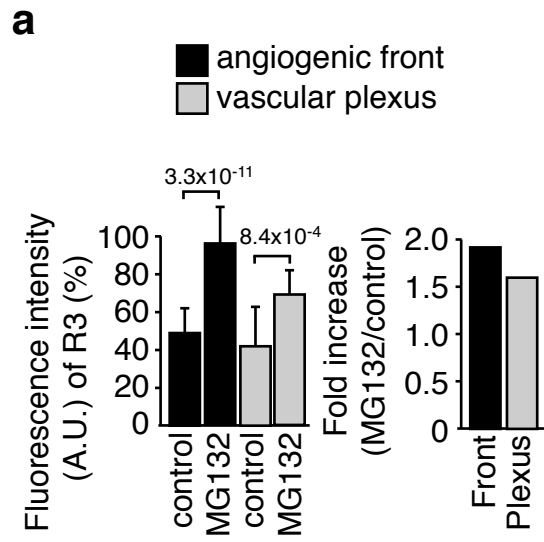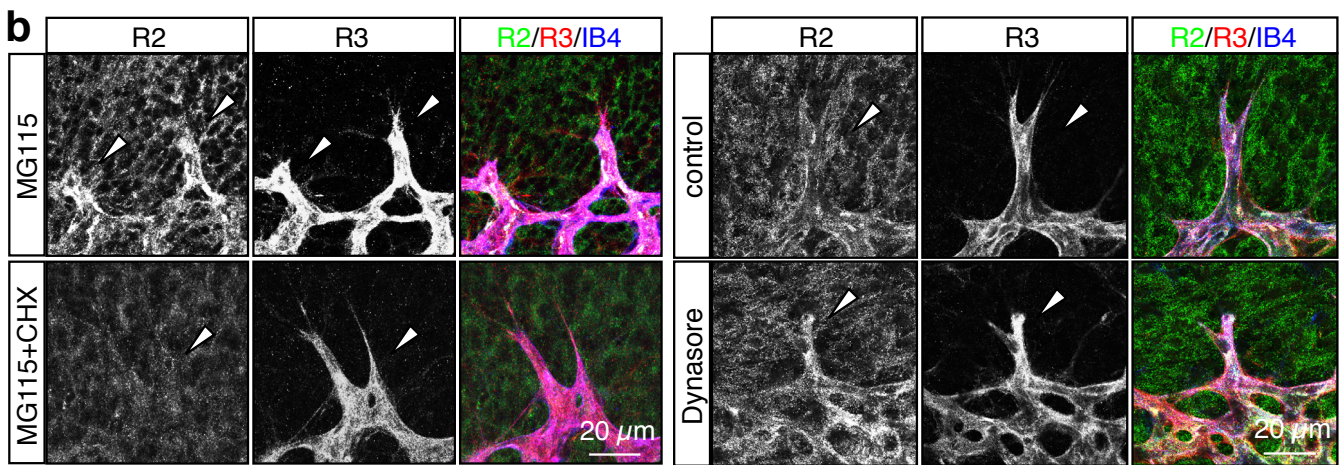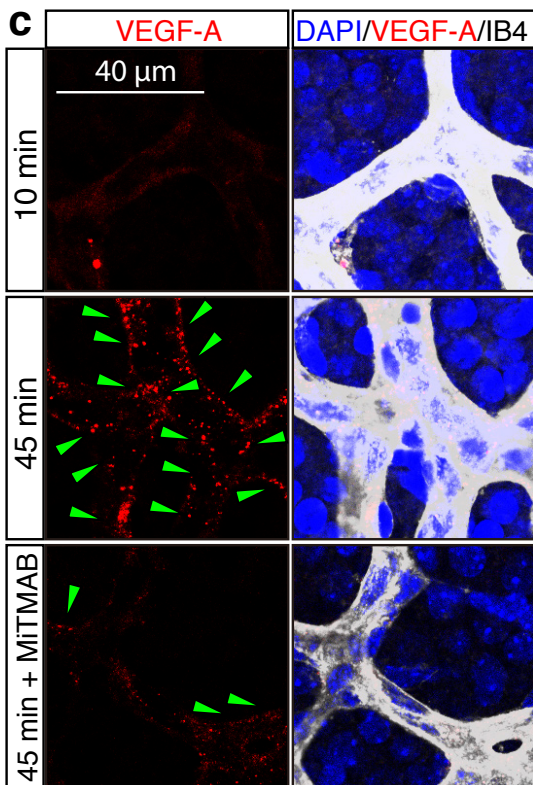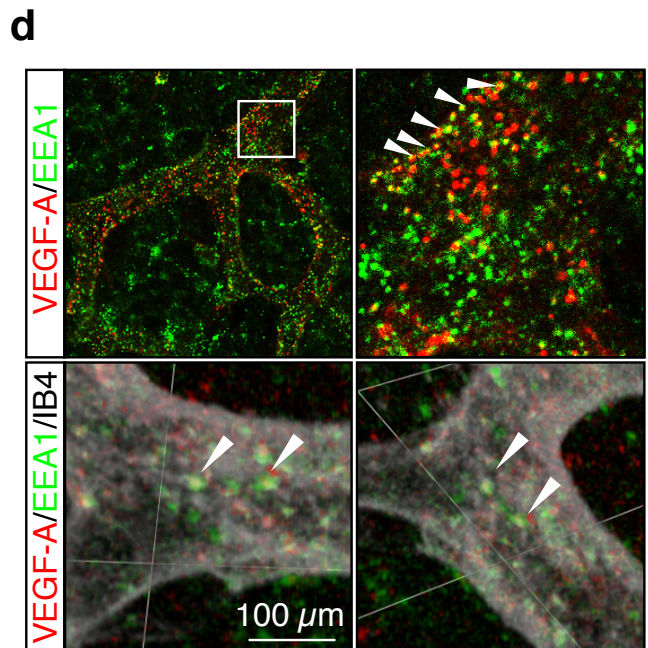

Figure S1, Nakayama et al.

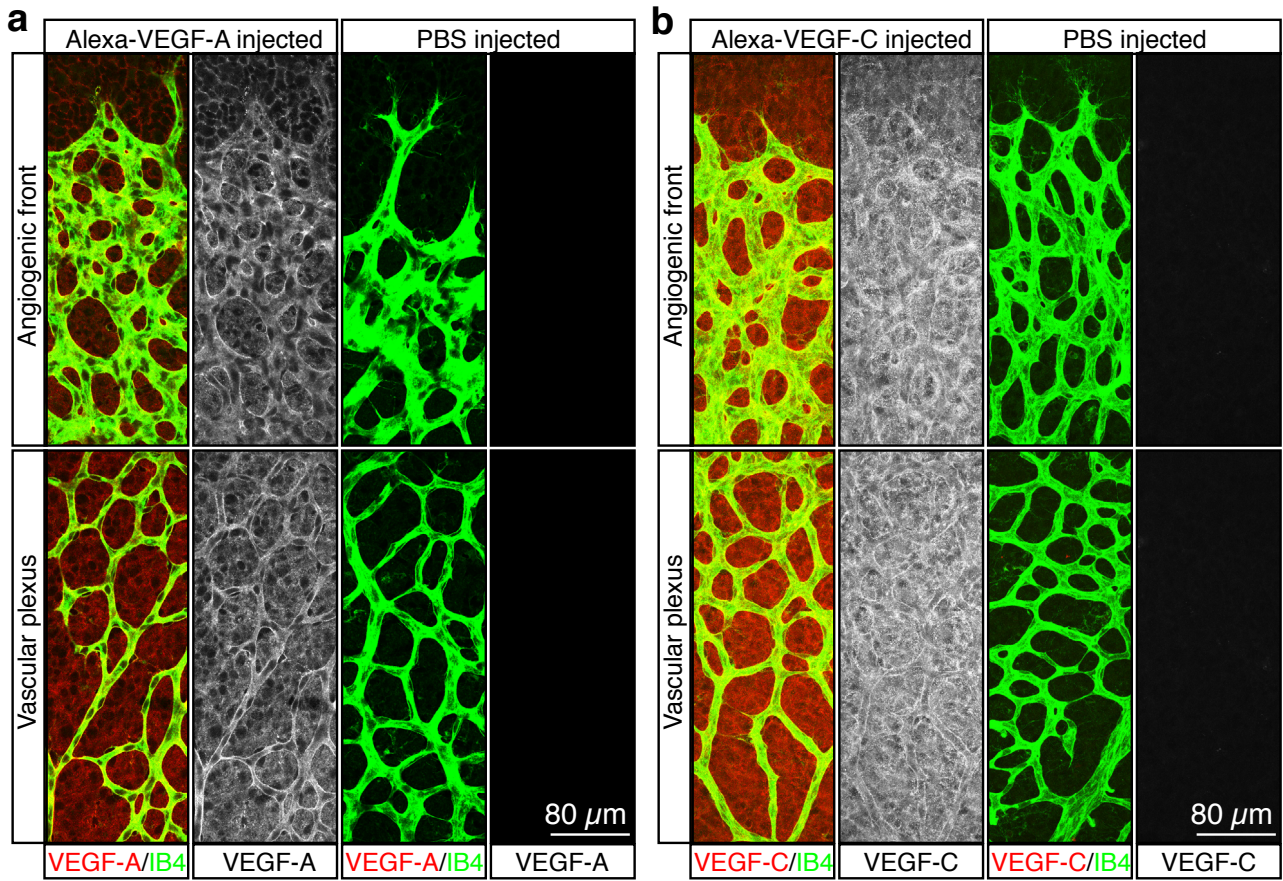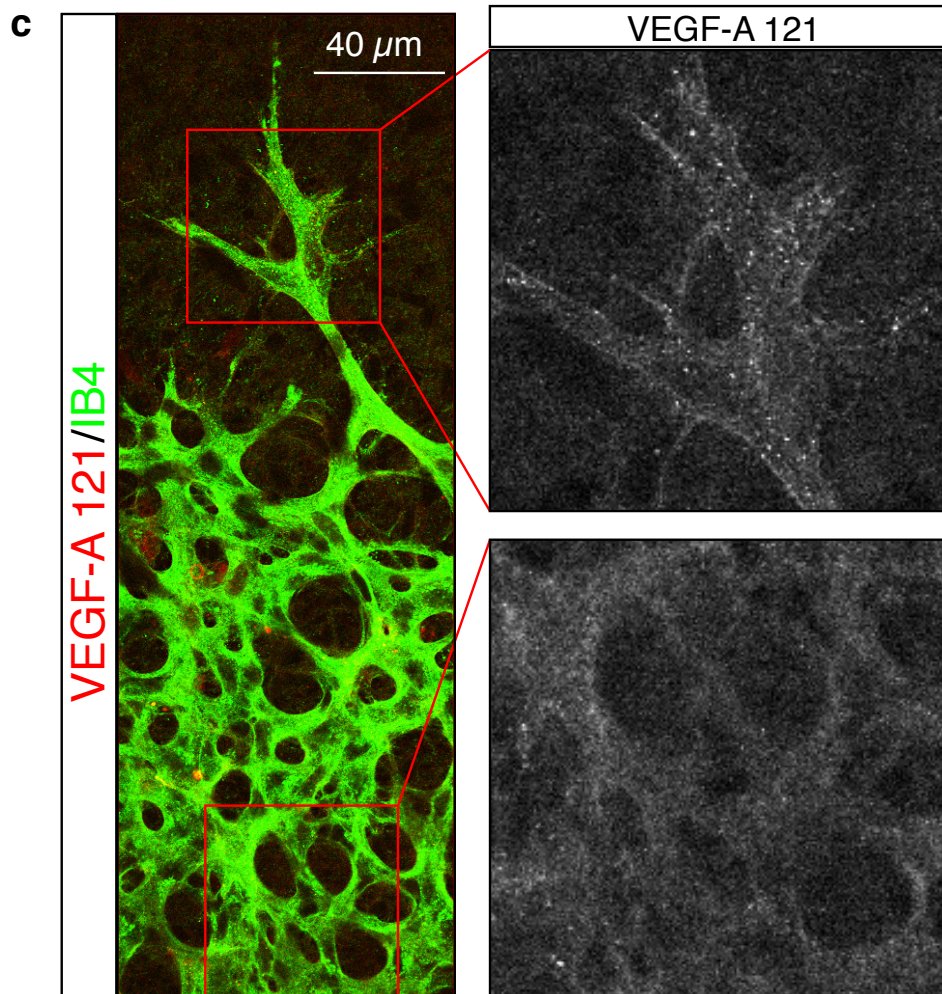

Figure S2, Nakayama et al.

**a**

```

MSNEVETSTT NGQPDQQAAP KAPSKKEKKK GSEKTDEYLL ARFKGDGVKY
KAKLIGIDVV PDARGDKMSQ DSMMKLKGMA AAGRSQGQHK QRIWVNISLS
GIKIIDEKTG VIEHEHPVNK ISFIARDVTD NRAFQYVCGG EGQHQFFAIK
TGQQAEPLVV DLKDLFQVIY NVKKKEEDKK KVEEANKAEE NGSEALMTLD
DQANKLKLGV DQMDLFGDMS TPPDLNSPTE SKDILLVDLN SEIDTNQNSL
RENPFLLTNGV TSCSLPRPKP QASFLPENAF SANLNFFPTP NPDPPRDDPF
AQPDQAPASS FDSLTPSPDQK KASLSSSSTP QSKGPLNGDT DYFGQQFDQL
SNRTGKPEAQ GGPWPYPSSQ TQQAVRTQNG VSEREQNGFH IKSSPNPFVG
SPPKGLSVPN GVKQDLESSV QSSAHDSIAI IPPPQSTKPG RGRRTAKSSA
NDLLASDIFA SEPPGQMSPT GQPAVPQSNF LDLFKGNAPA PVGPLVGLGT
VPVTPPQAGP WTPVVYSPST TVVPGAIISG QPPSFRQPLV FGTTPAVQVW
NQSPSFATPA SPPPPVTWCP TTSVAPNAWS STSPLGNPFQ SNNIFPPPTM
STQSSPQPM SSVLATPPQP PPRNGPLKDI PSDAFTGLDP LGDKEVKEVK
EMFKDFQLRQ PPLVPSRKG ETPPSGTSSAF SSYFNNKVG I PQEHVDHDDF
DANQLLNKIN EPPKPAPRQG VLLGTKSADN SLENPFSGKF SSSNPSVVSQ
PASSDPHRSP FGNPFA

```

**b**

T <sup>y7</sup> D <sup>y6</sup> E <sup>y5</sup> Y <sup>y3</sup> L <sup>y2</sup> L A R  
<sub>a2 b3 b4 b5 b6 b7</sub>

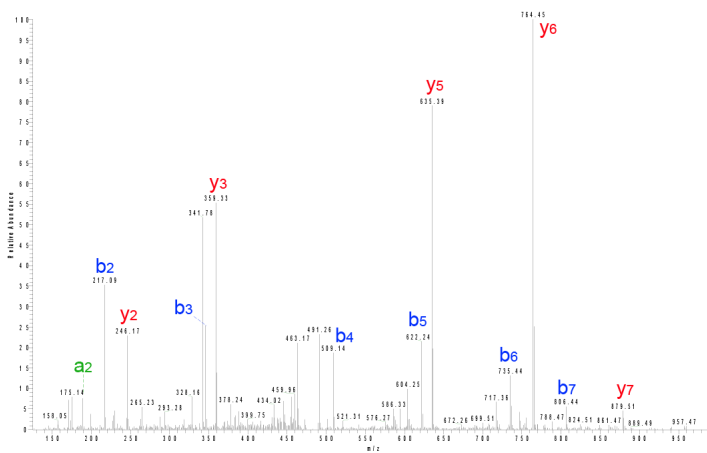

L <sup>y9</sup> I <sup>y8</sup> G <sup>y7</sup> I <sup>y6</sup> D <sup>y5</sup> D <sup>y4</sup> V <sup>y2</sup> P D A R  
<sub>b2 b3 b4 b5 b6 b7 b9</sub>

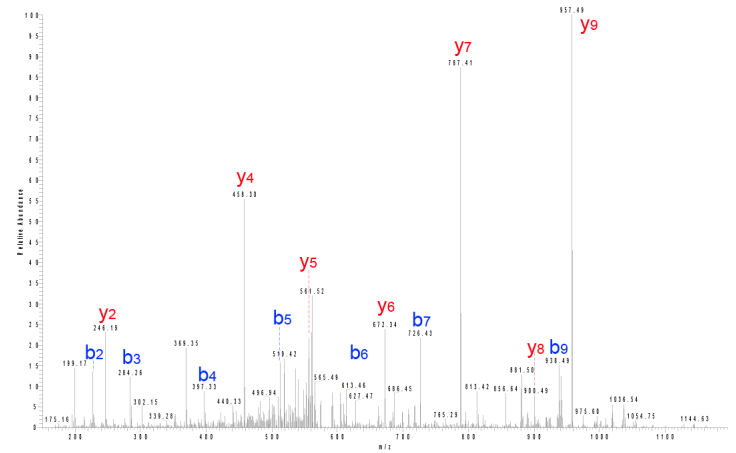

M <sup>y7</sup> S <sup>y6</sup> Q <sup>y5</sup> D <sup>y4</sup> S M M K  
<sub>a2 b4</sub>

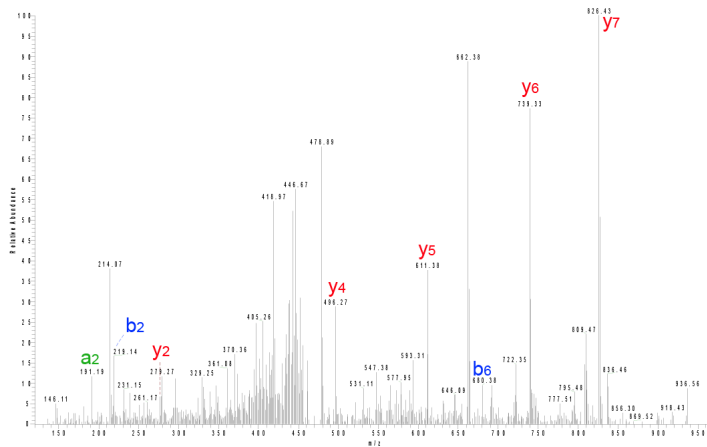

T <sup>y12</sup> G <sup>y1</sup> Q <sup>y9</sup> Q <sup>y8</sup> A <sup>y7</sup> E <sup>y5</sup> P <sup>y4</sup> L <sup>y3</sup> V <sup>y2</sup> V <sup>y2</sup> D L K  
<sub>b3 b4 b5 b6 b8 b9 b10 b11 b12</sub>

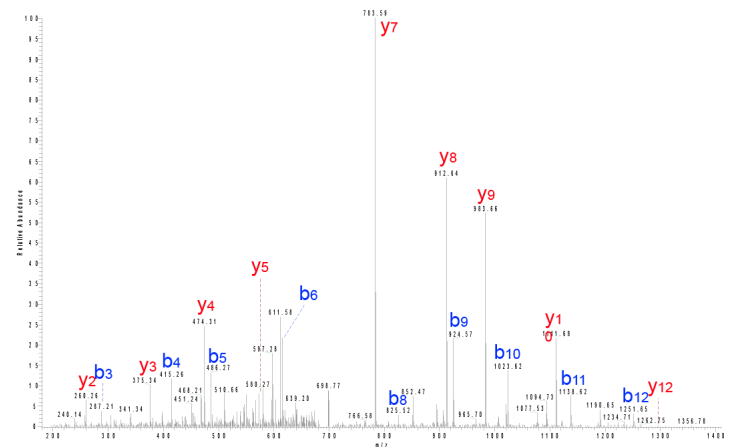

Figure S3, Nakayama et al.

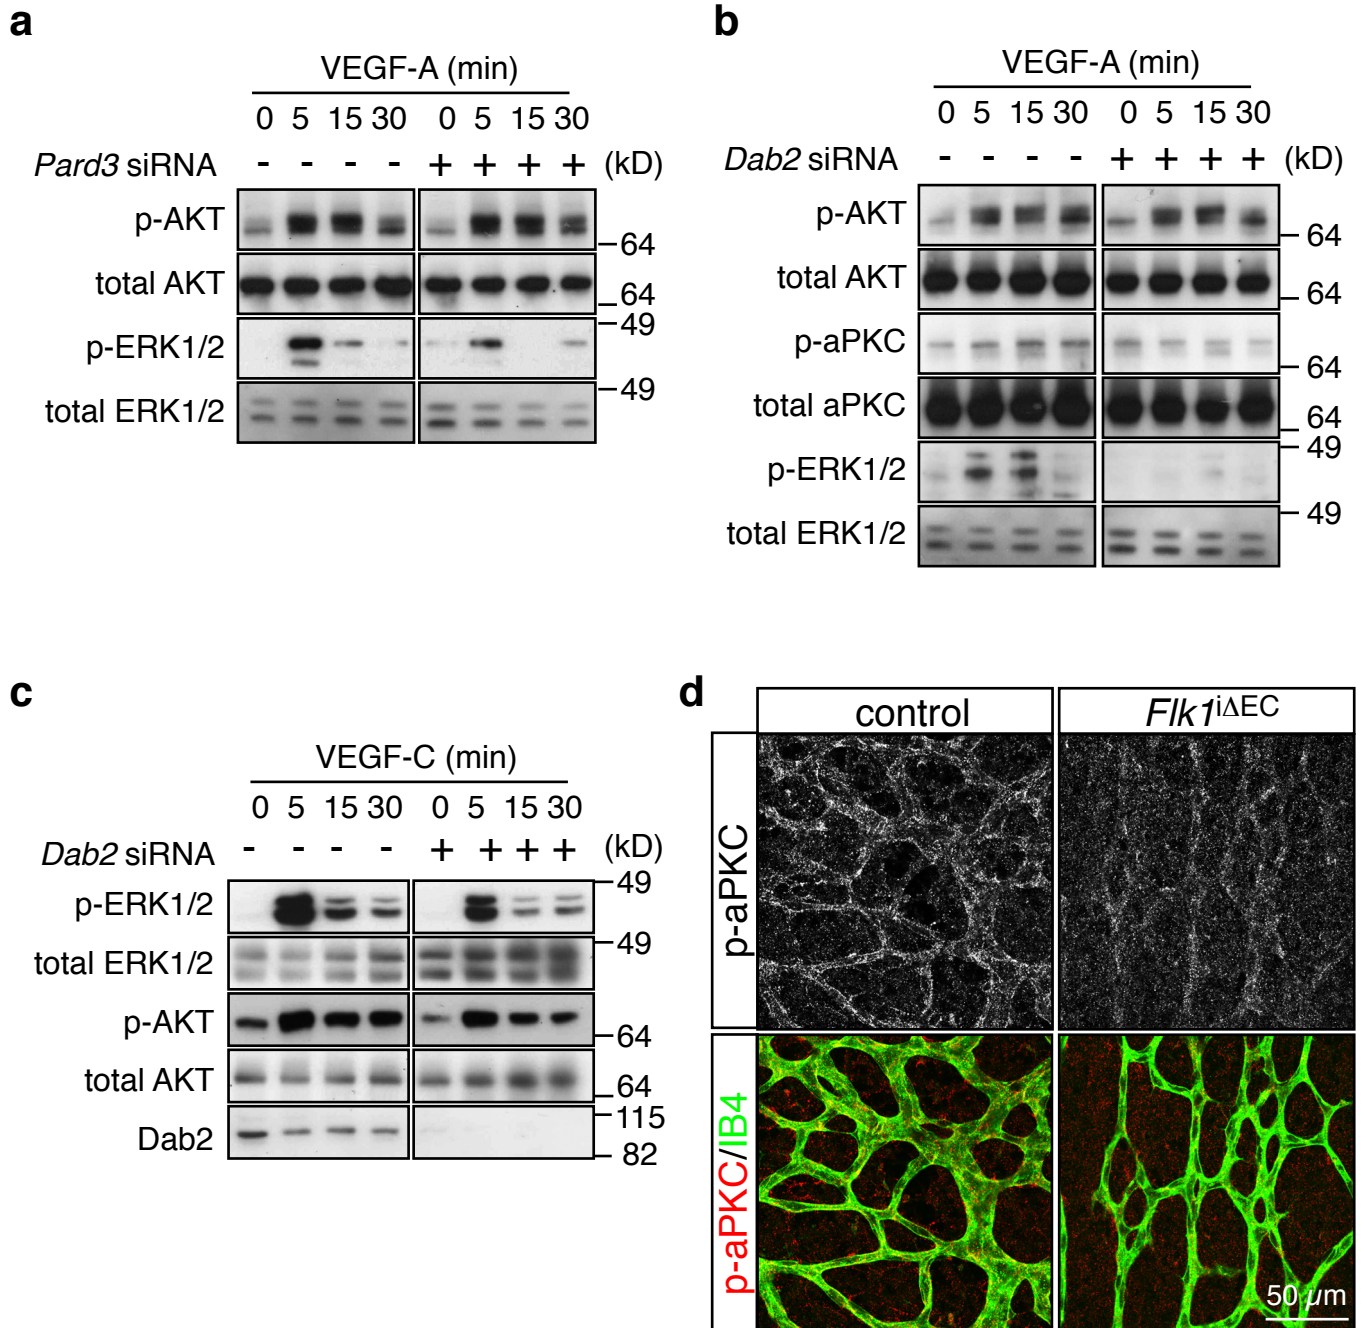

Figure S4, Nakayama et al.

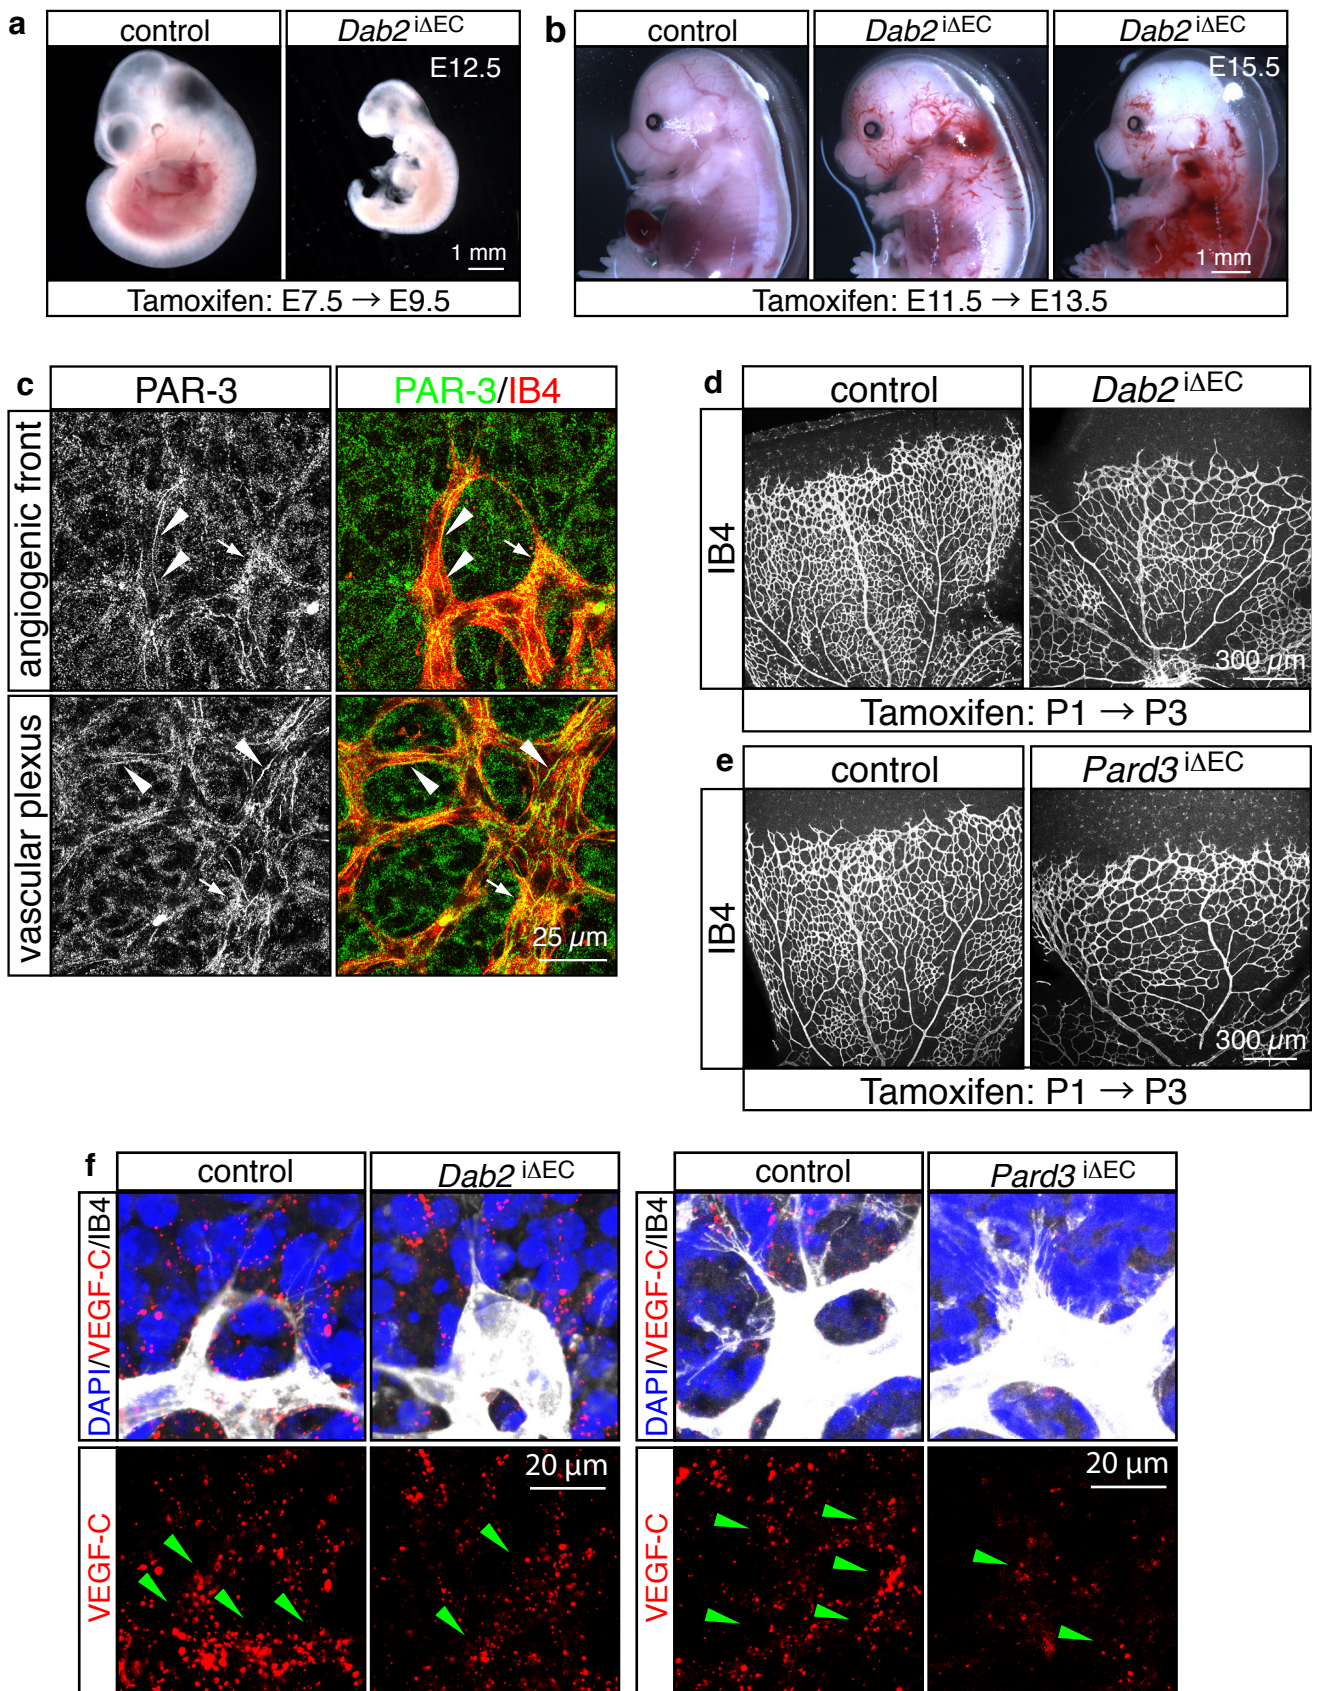

Figure S5, Nakayama et al.

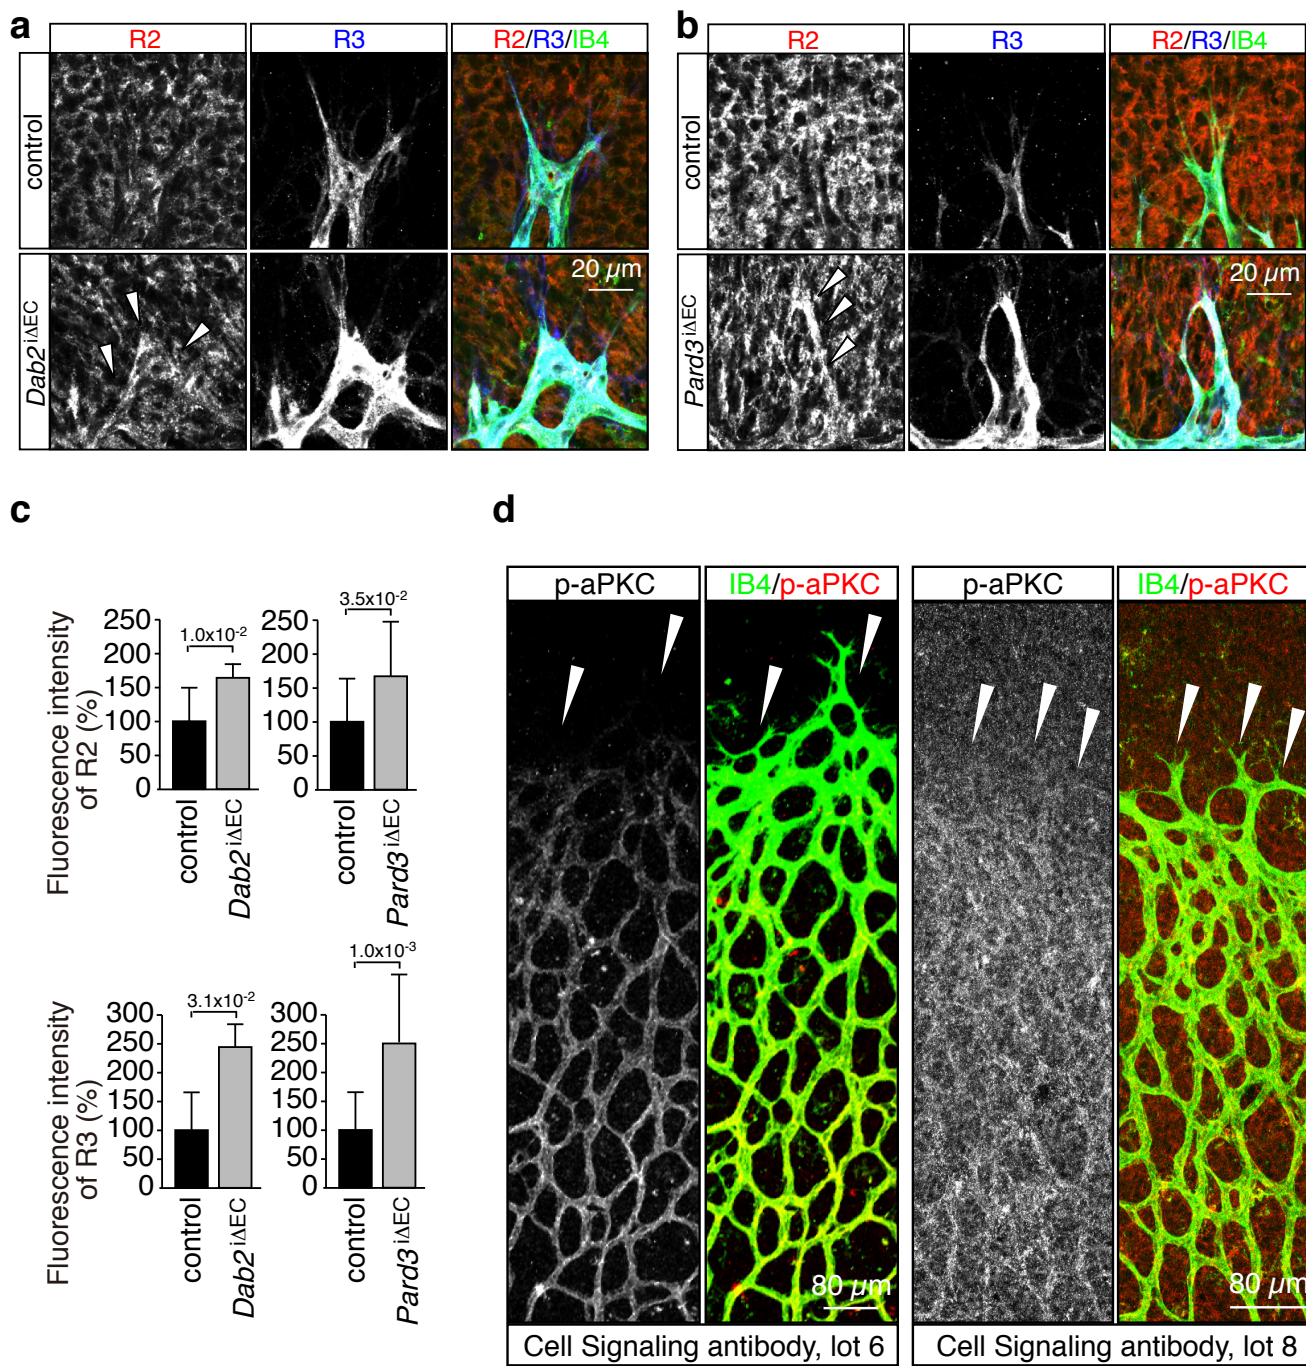

Figure S6, Nakayama et al.

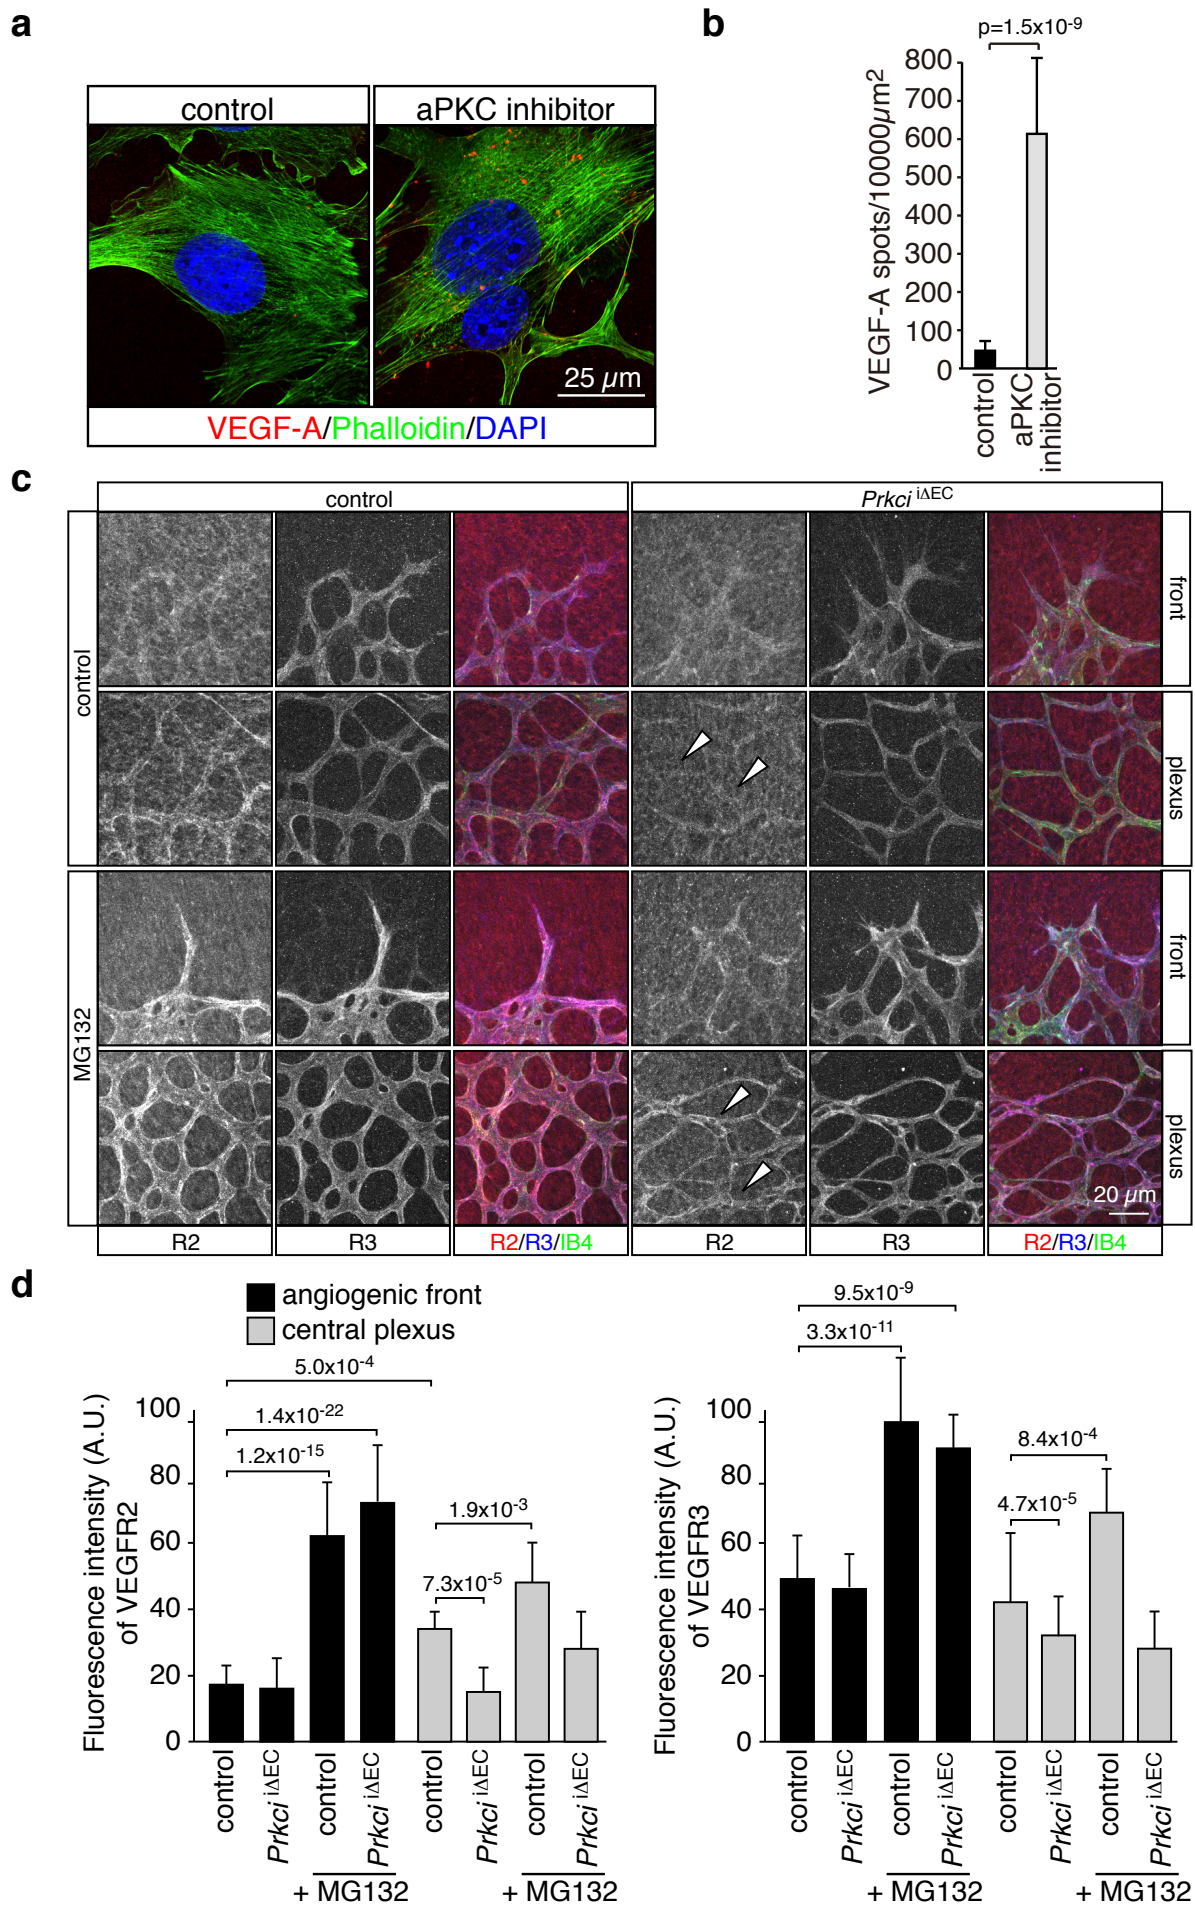

Figure S7, Nakayama et al.

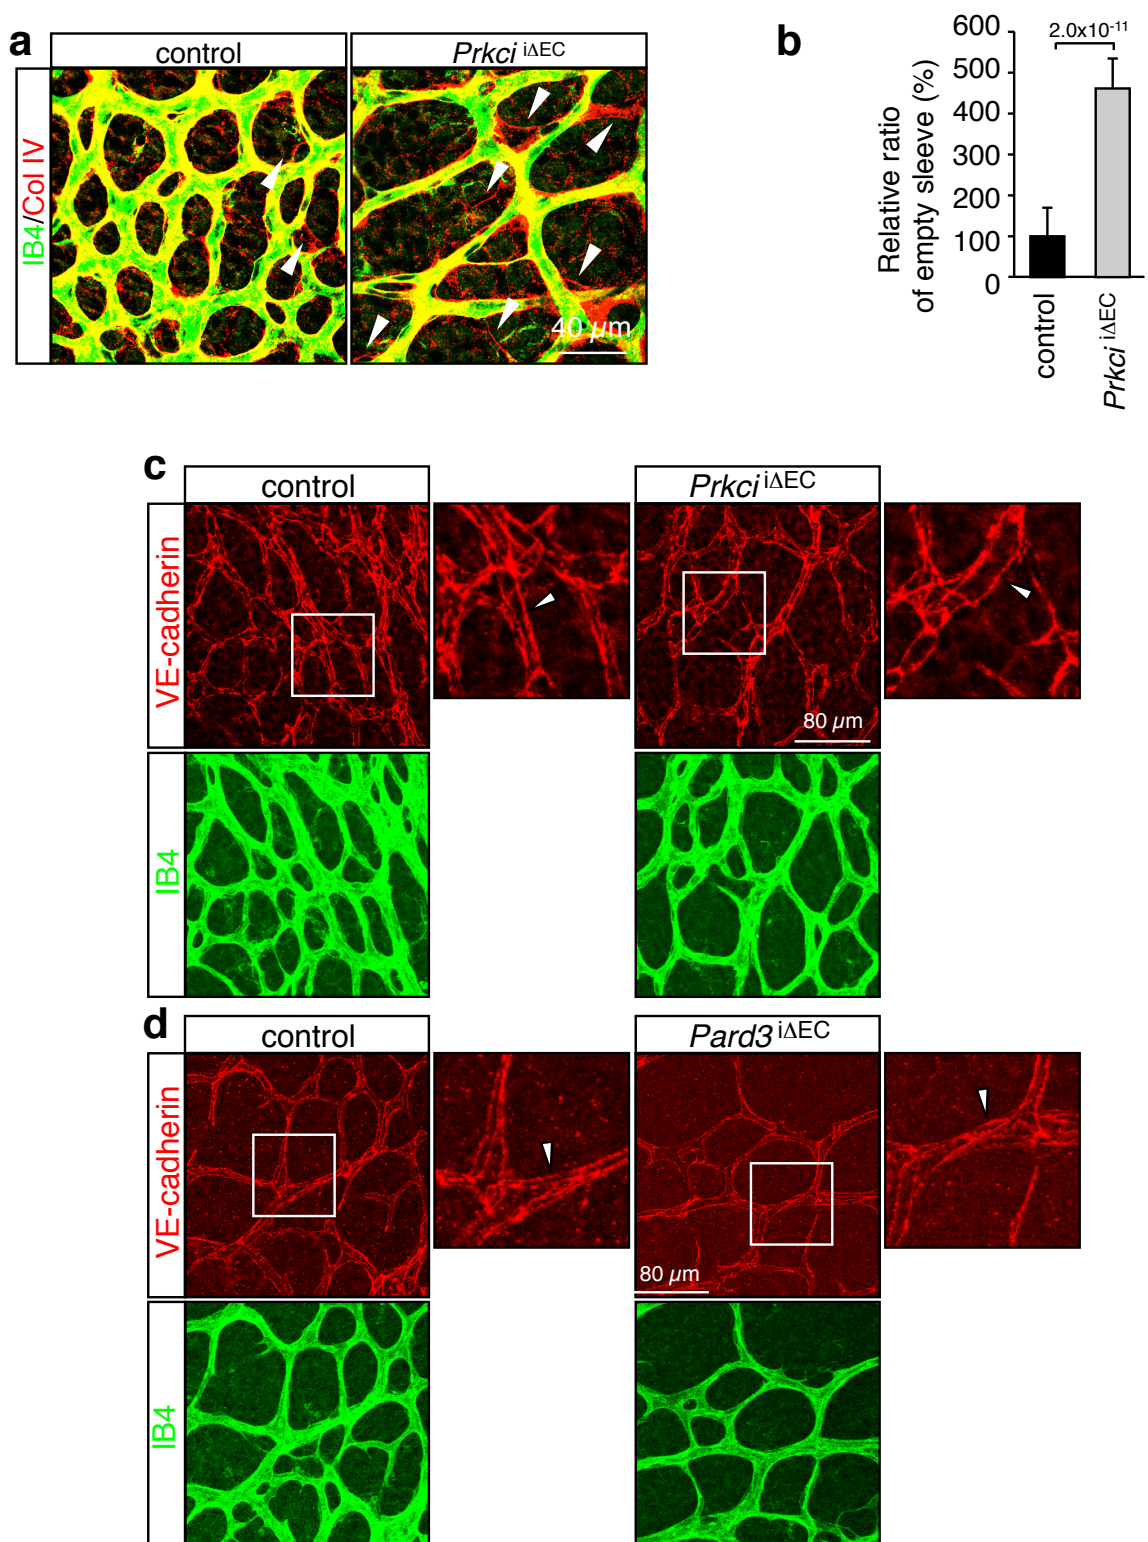

Figure S8, Nakayama et al.



Fig 3d

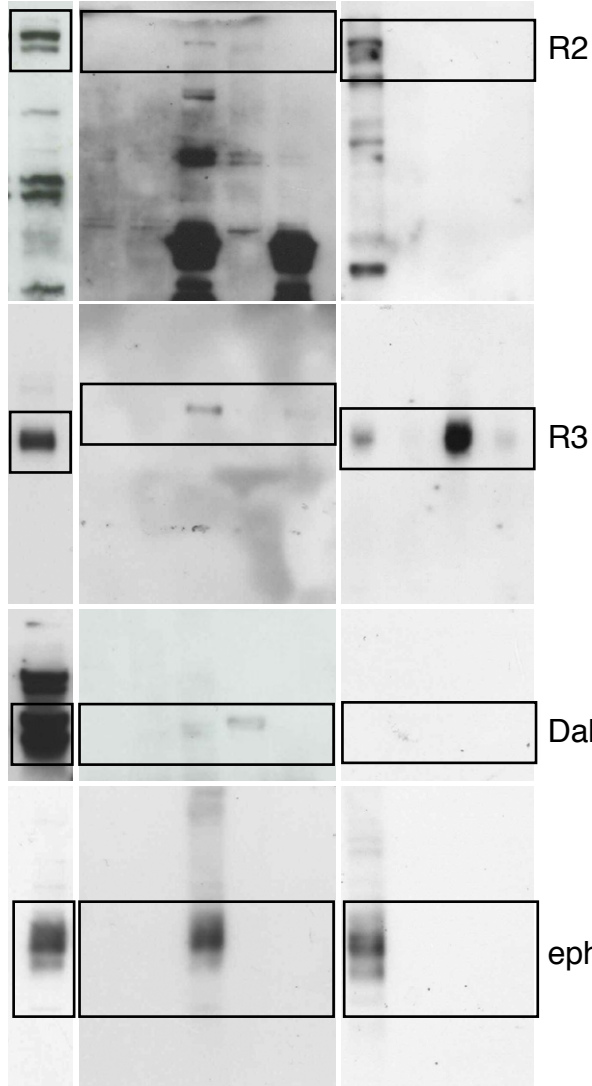

Fig 3e

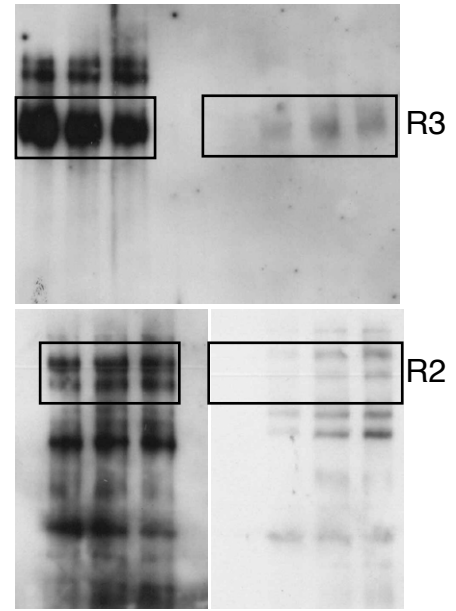

Fig 3c

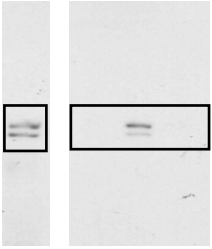

Fig 3f

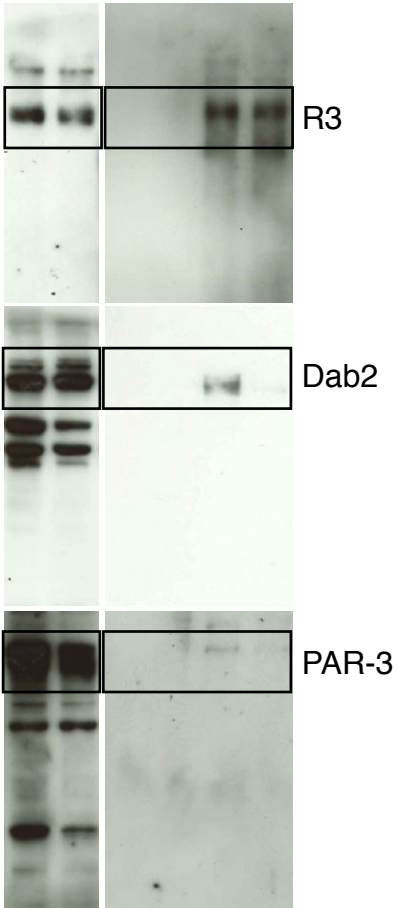

Fig 3g

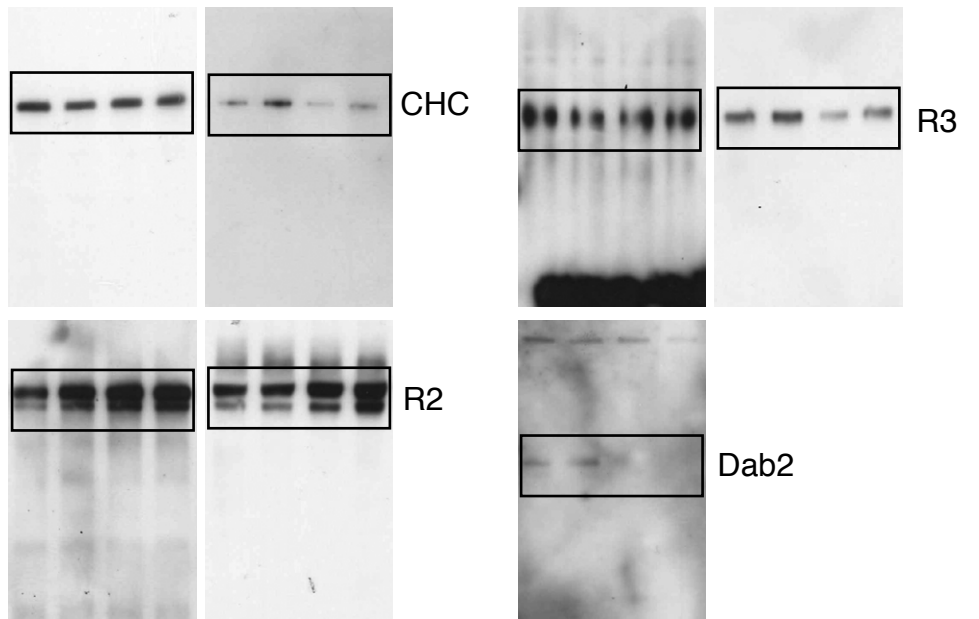

Fig 4d

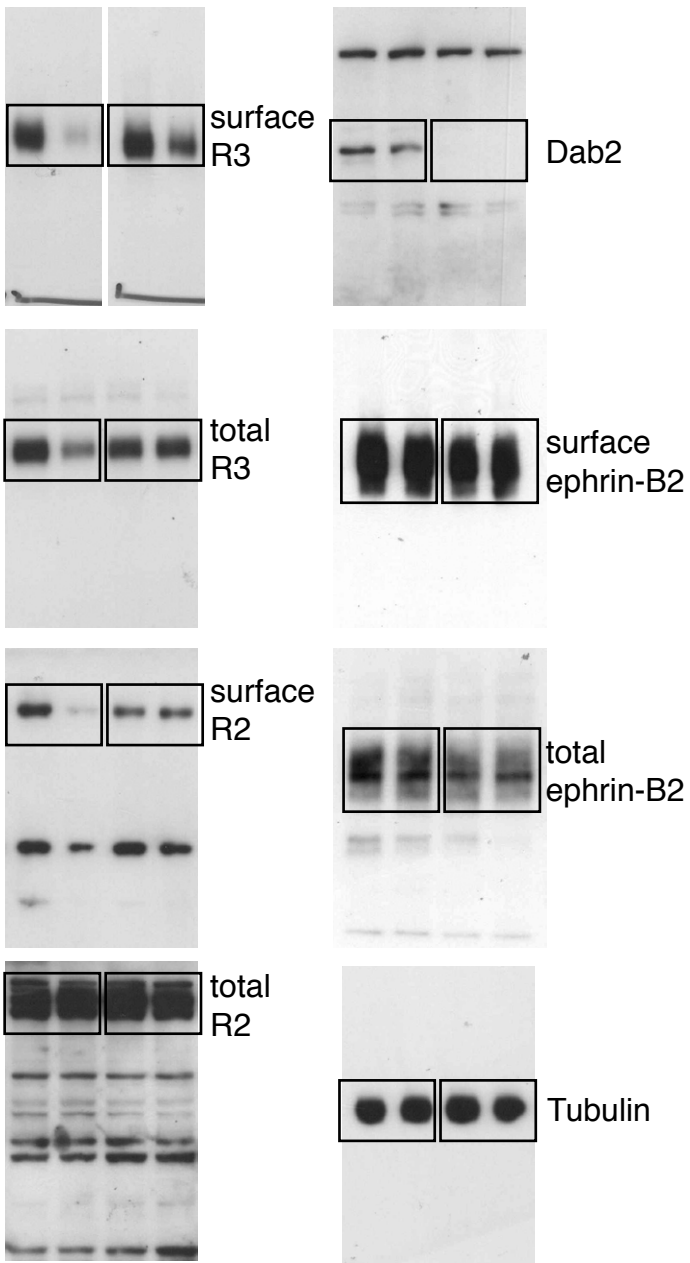

Fig 4e

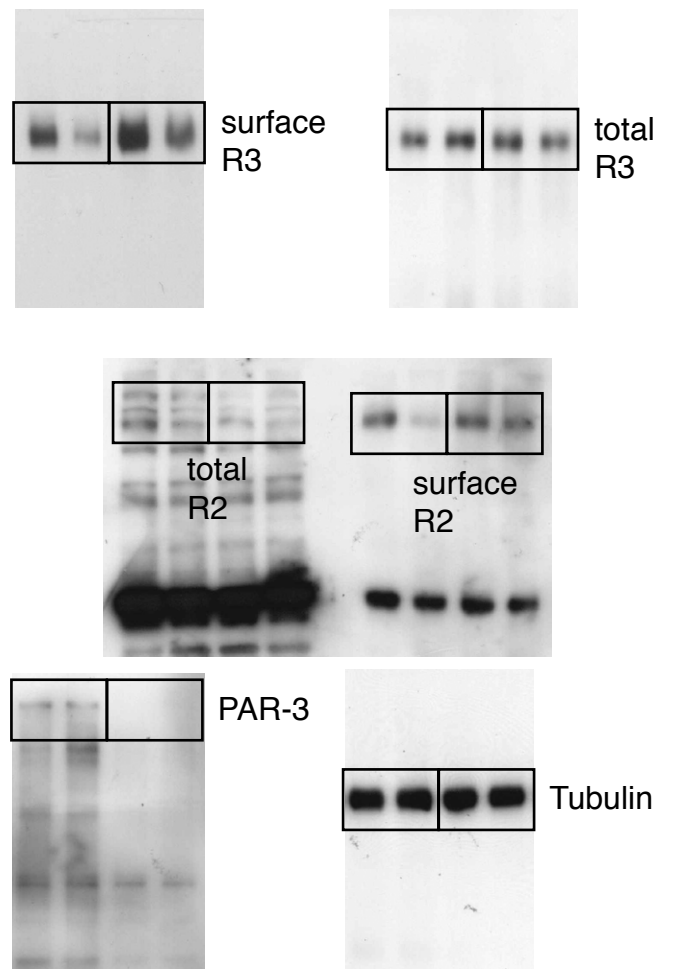

Fig 4f

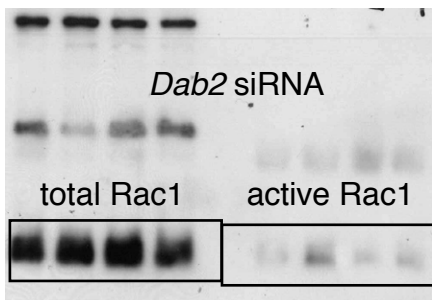

Fig 4f

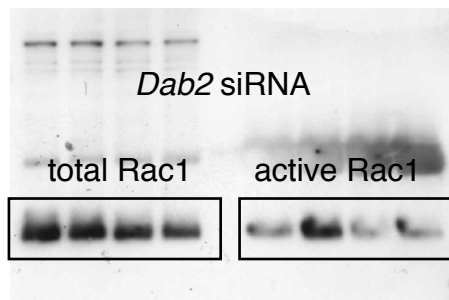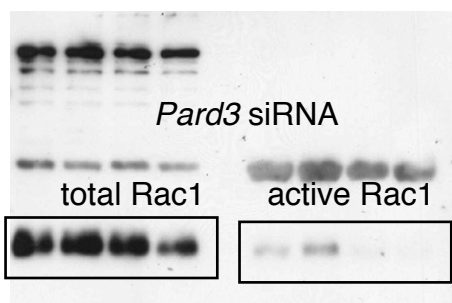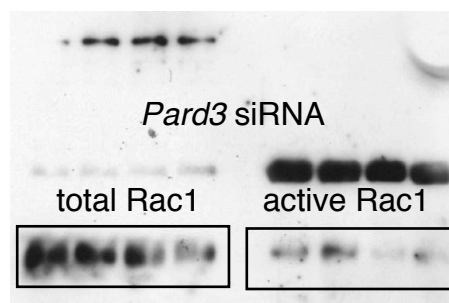

Fig 6a

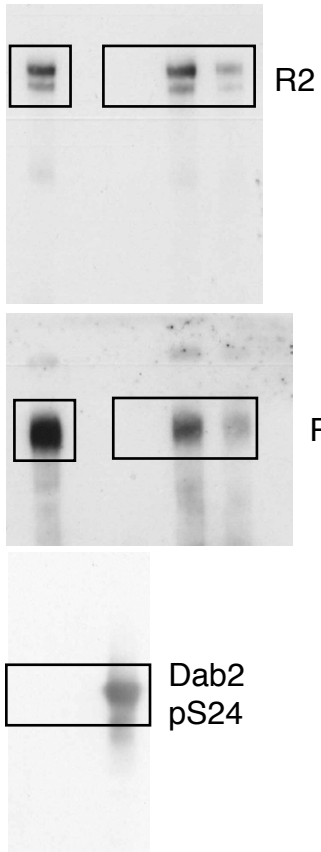

Fig 6c

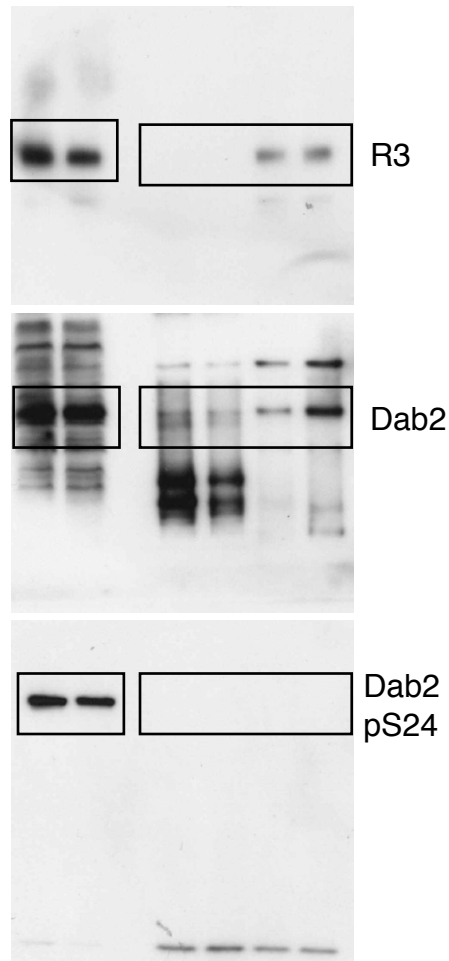

Fig 6d

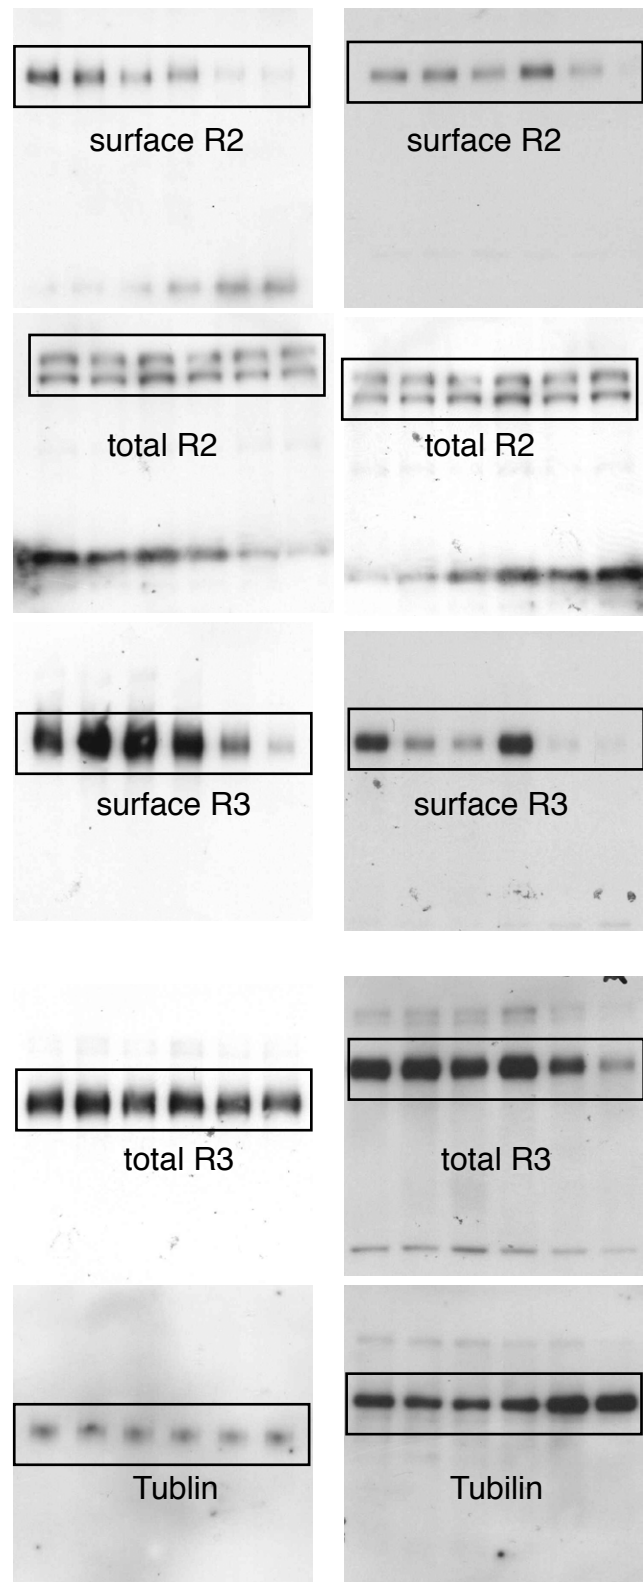

Fig 6b

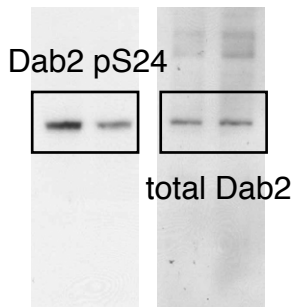

Fig 6e

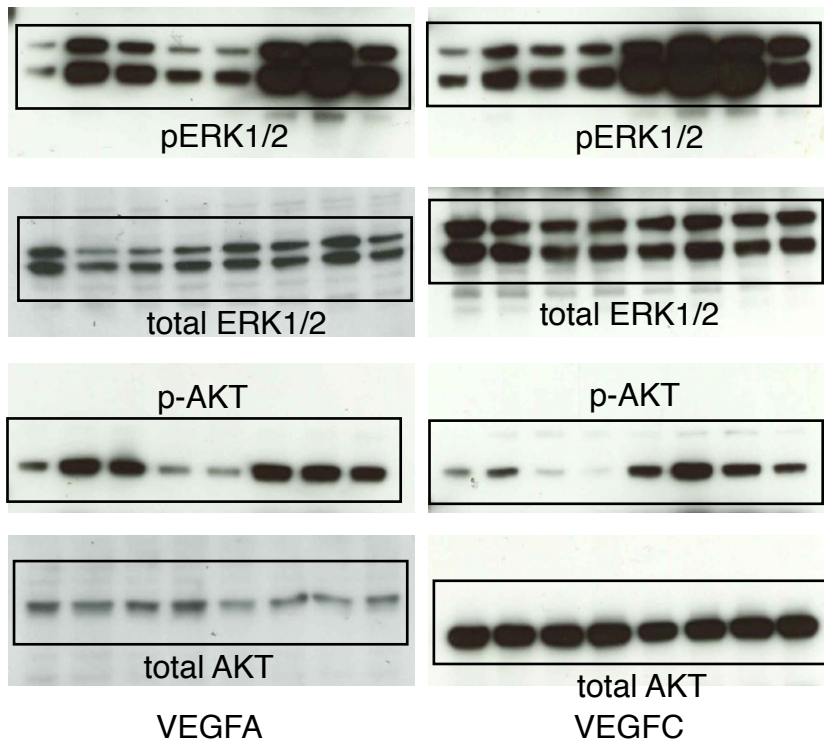

Fig S4a

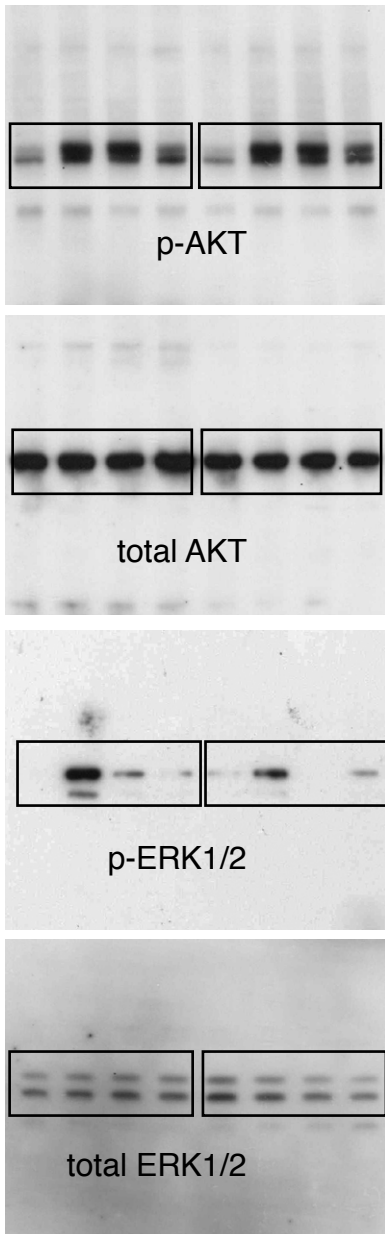

Fig S4b

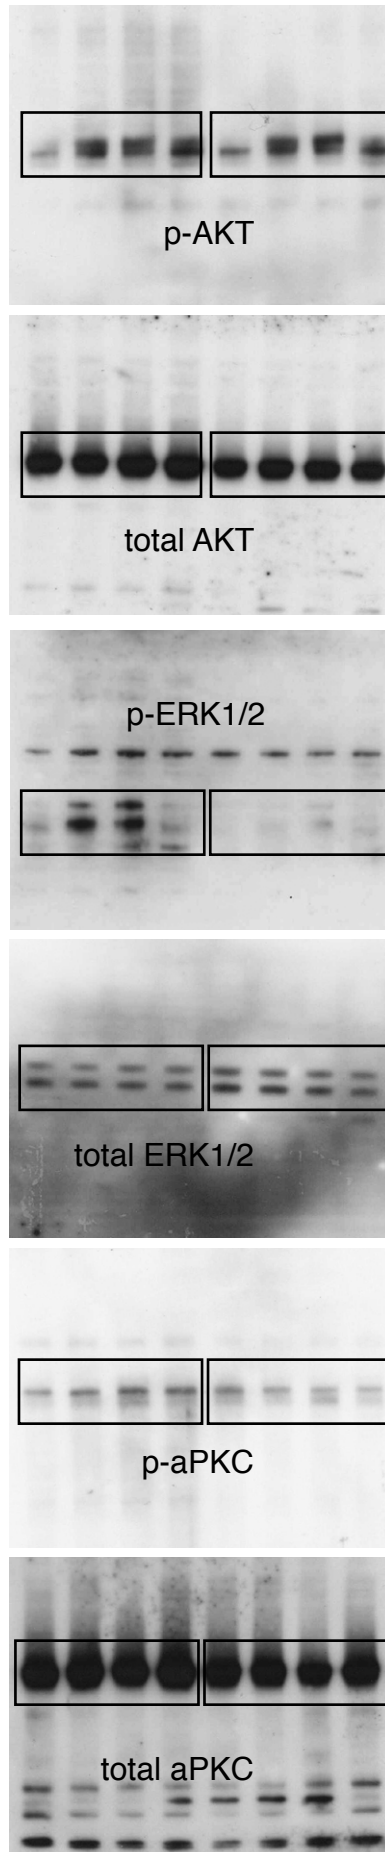

Fig S4c

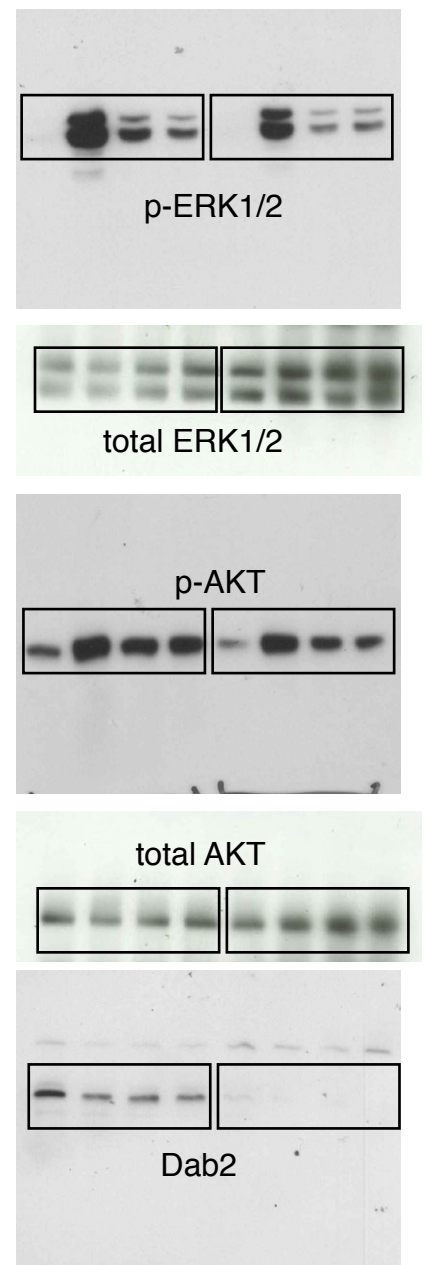

Supplement: NIHMS535311-supplement-Supplementary_Figure_S1-S9.pdf [file NIHMS535311-supplement-Supplementary_Figure_S1-S9.pdf]
